# Supplementary material for: Burkholderia of Plant-Beneficial Group are Symbiotically Associated with Bordered Plant Bugs (Heteroptera: Pyrrhocoroidea: Largidae)
Source: PubMed Central journal article supplement (PMC4676555; doi:10.1264/jsme2.me15153), 2015-12-09
Supplement: 30_321_s1.pdf [file 30_321_s1.pdf]

**Table S1. Primers and a probe used in this study.**

| Target group                  | Target gene | Primer/Probe name | Sequence (5' → 3')            | Reference <sup>a</sup> |
|-------------------------------|-------------|-------------------|-------------------------------|------------------------|
| Primers                       |             |                   |                               |                        |
| Eubacteria                    | 16S rRNA    | 16SA1             | AGAGTTTGATCMTGGCTCAG          | (20)                   |
|                               |             | 16SB1             | TACGGYTACCTTGTTACGACTT        | (20)                   |
| Eubacteria                    | 16S rRNA    | 515F              | GTGCCAGCMGCCGCGGTAA           | (9)                    |
|                               |             | 806R              | GGACTACHVGGGTWTCTAAT          | (9)                    |
| <i>Burkholderia</i> PBE clade | 16S rRNA    | 16SA1             | AGAGTTTGATCMTGGCTCAG          | (20)                   |
|                               |             | BurkPBE           | ACCTCTCAGCAAGGTTCCGTA         | This study             |
| Invertebrates                 | <i>COI</i>  | LCO1490           | GGTCAACAAATCATAAAGATATTGG     | (19)                   |
|                               |             | HCO2198           | TAAACTTCAGGGTGACCAAAAAATCA    | (19)                   |
| Probe                         |             |                   |                               |                        |
| <i>Betaproteobacteria</i>     | 16S rRNA    | BET940            | Alexa555-TTAATCCACATCATCCACCG | (14)                   |

<sup>a</sup> Detailed information of the references:

9. Caporaso, J.G., C.L. Lauber, W.A. Walters, et al. 2012. Ultra-high-throughput microbial community analysis on the Illumina HiSeq and MiSeq platforms. *ISME J* 6: 1621–1624.
14. Demanèche, S., H. Sanguin, J. Poté, E. Navarro, D. Bernillon, P. Mavingui, W. Wildi, T.M. Vogel, and P. Simonet. 2008. Antibiotic-resistant soil bacteria in transgenic plant fields. *Proc Natl Acad Sci U S A* 105: 3957–3962.
19. Folmer, O., M. Black, W. Hoeh, R. Lutz, and R. Vrijenhoek. 1994. DNA primers for amplification of mitochondrial cytochrome c oxidase subunit I from diverse metazoan invertebrates. *Mol Mar Biol Biotechnol* 3: 294–299.
20. Fukatsu, T., and N. Nikoh. 1998. Two intracellular symbiotic bacteria from the mulberry psyllid *Anomoneura mori* (insecta Homoptera). *Appl Environ Microbiol* 64: 3599–3606.

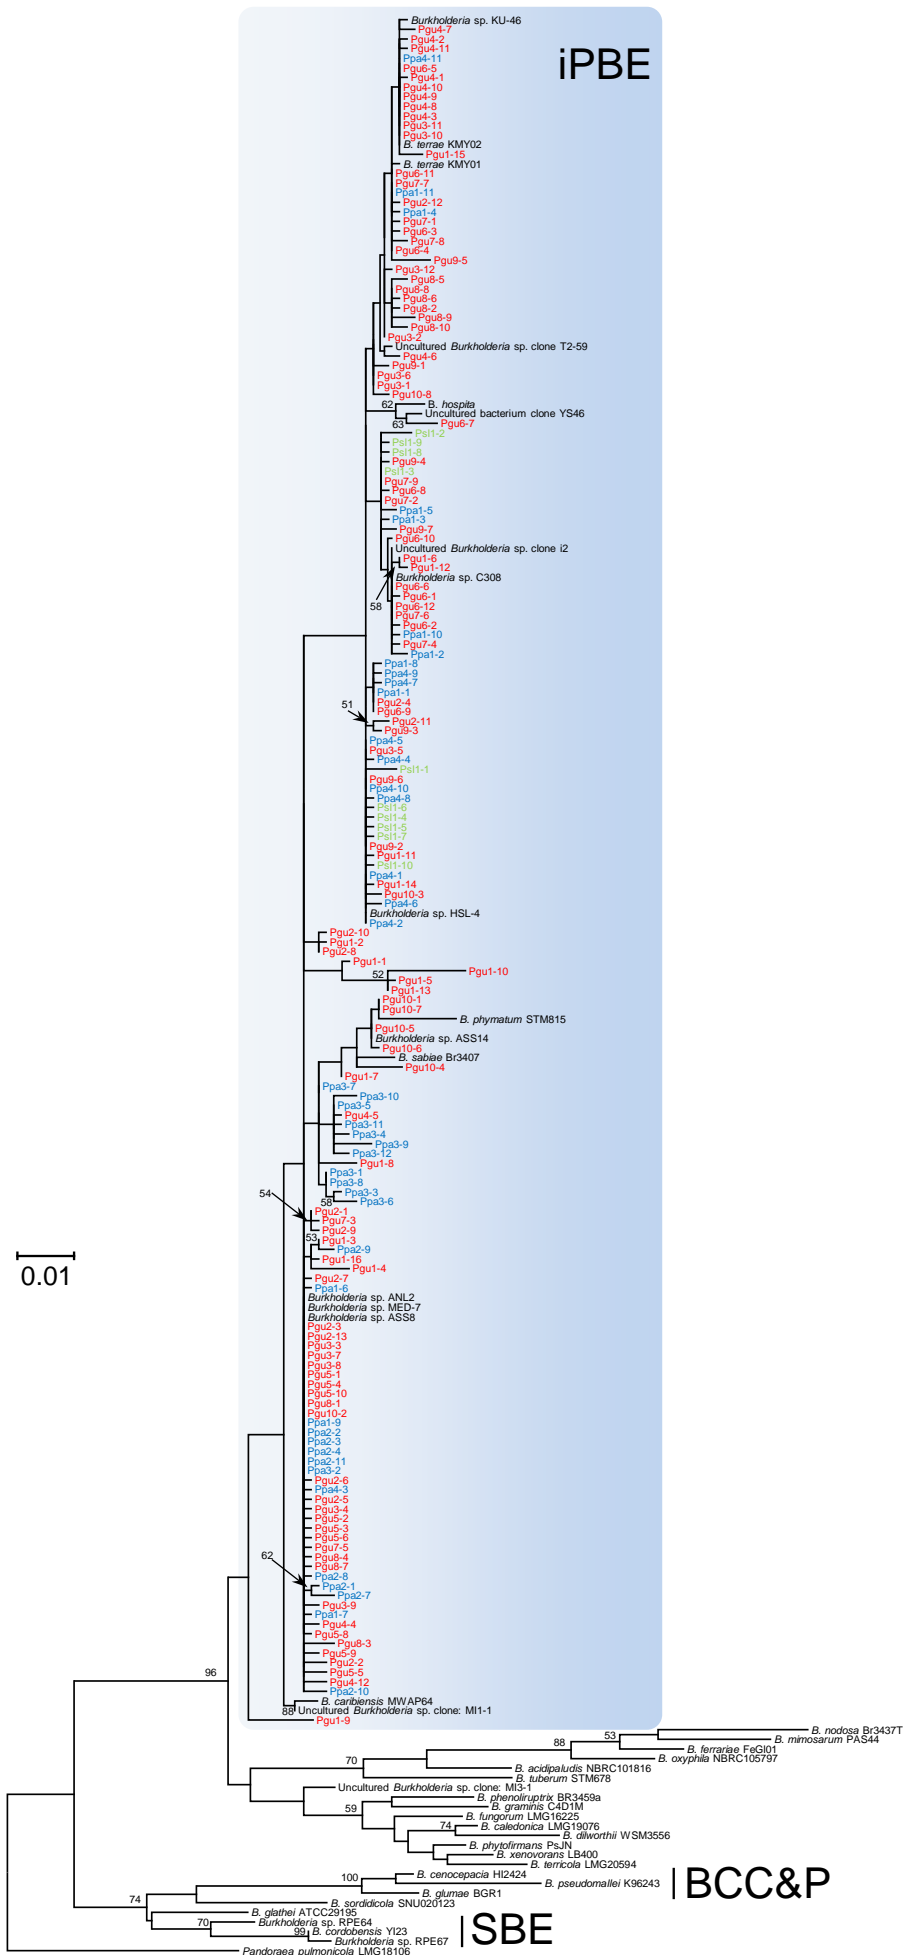

iPB

PBE

BCC&P

SBE

0.01

**Fig. S1.** Molecular phylogeny of all the gut symbiotic bacteria of *Physopelta* species detected in this study. A maximum likelihood (ML) phylogeny is shown of 161 clones of the gut symbiotic *Burkholderia* identified from *Physopelta gutta*, *P. parviceps*, and *P. slanbuschii* together with selected representatives of the different *Burkholderia* groups. The alignment of 1,350 nucleotide sites of the bacterial 16S rRNA gene was used. The gut symbionts of the *Physopelta* species are indicated with colors: red, *P. gutta*; blue, *P. parviceps*; and green, *P. slanbuschii*. The origins or sources of isolation of the *Burkholderia* strains/sequences and accession numbers in the DNA database (DDBJ/ EMBL/GenBank) are shown in Fig. 2 and Fig. S2. The major *Burkholderia* clades (BCC&P, SBE and PBE) and a subclade “insect-associated PBE (iPBE)” are indicated on the right. Bootstrap values higher than 50% are depicted at the nodes.

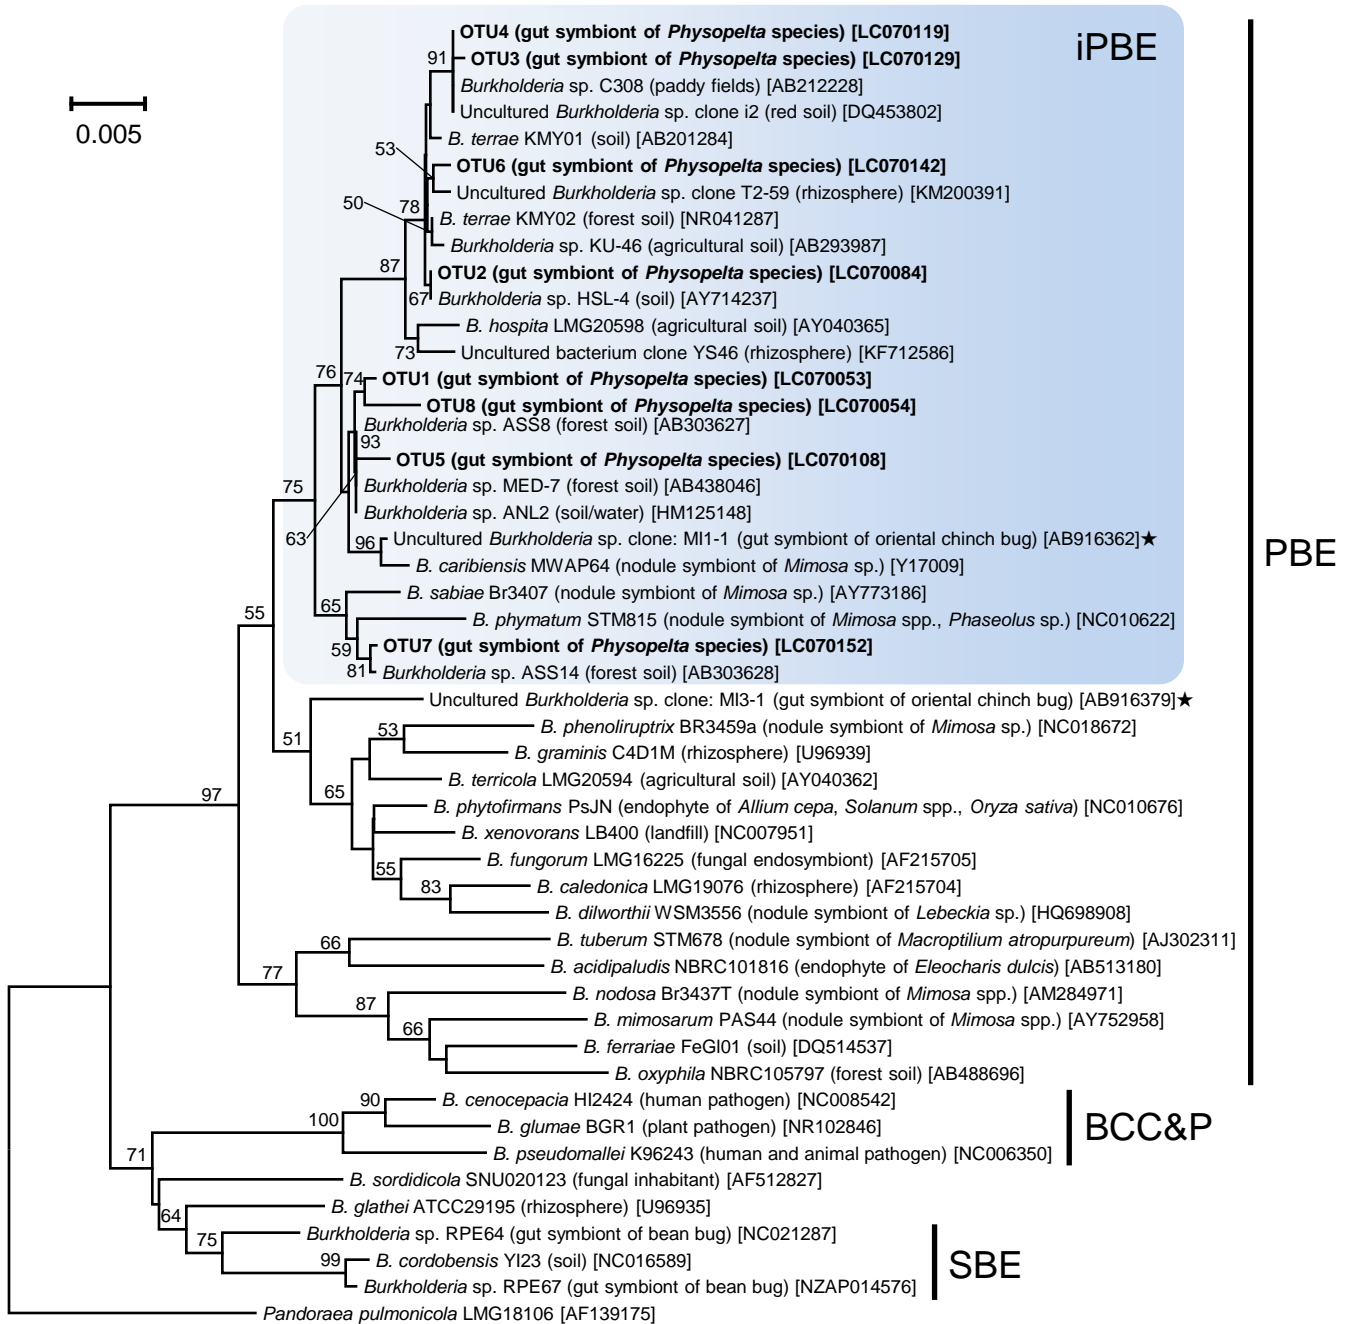

**Fig. S2.** Molecular phylogeny of the gut symbiotic bacteria of *Physopelta* species. The tree represents a neighbor-joining (NJ) phylogeny of eight OTUs of the gut symbiotic bacteria identified from *Physopelta gutta*, *P. parviceps*, and *P. slantbuschii* together with selected representatives of the different *Burkholderia* groups. The alignment of 1,356 nucleotide sites of the bacterial 16S rRNA gene was used. The gut symbionts of the *Physopelta* species are shown in bold. The origins or sources of isolation of the *Burkholderia* strains/sequences are represented in parentheses. Accession numbers in the DNA database (DDBJ/EMBL/GenBank) are shown in square brackets. Stars indicate gut symbionts detected from the oriental chinch bug *Cavelerius saccharivorus* (Lygaeoidea: Blissidae) in our previous study (31). The major *Burkholderia* clades (BCC&P, SBE and PBE) and a subclade “insect-associated PBE (iPBE)” are indicated on the right. Bootstrap values higher than 50% are depicted at the nodes.

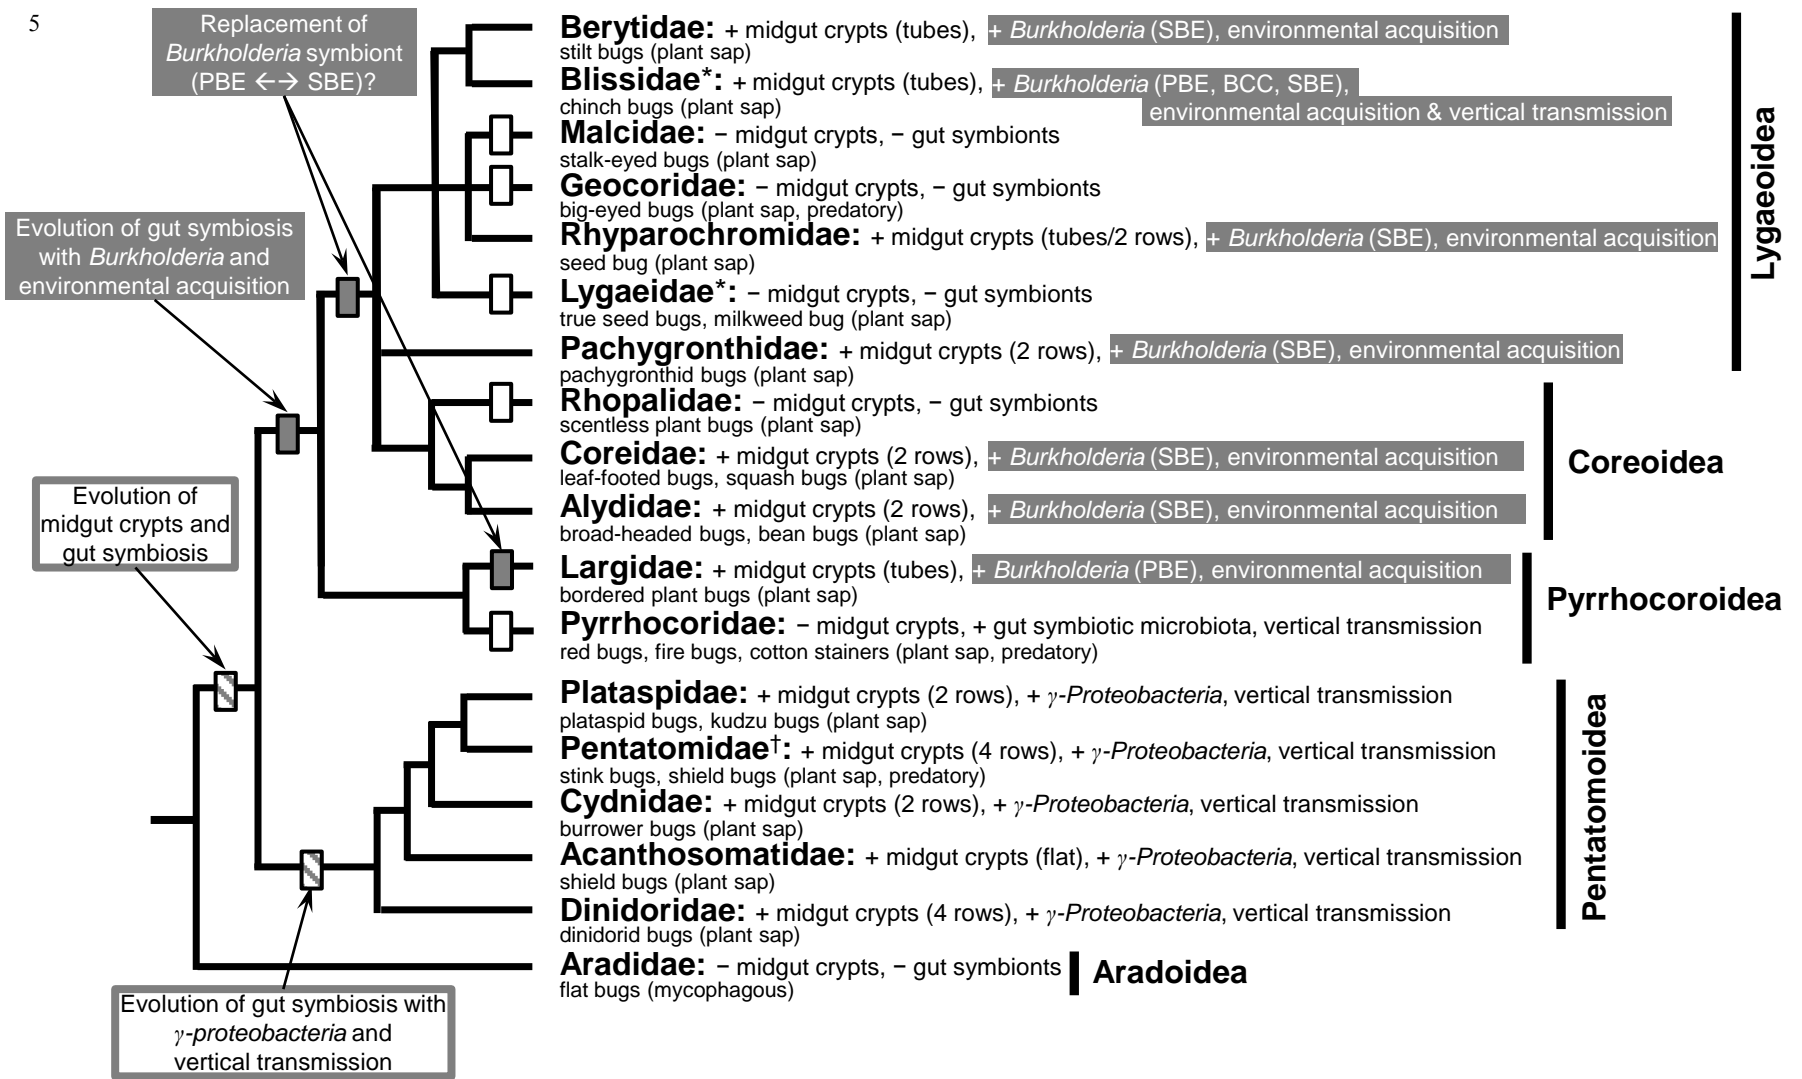

**Fig. S3.** Evolution of *Burkholderia* symbiosis in the Pentatomomorpha. Phylogeny of higher taxa in the Pentatomomorpha, inferred from previous phylogenetic studies based on molecular data or morphological data (25, 28, 73). Symbiotic systems of the pentatomomorphan families are based on previous studies (1, 4, 6, 22–24, 26, 27, 31–34, 36, 37, 39–42, 46, 47, 49, 51, 53, 55–58, 64, 65, 67). Presence/absence of symbiotic bacteria, symbiont taxonomy, transmission mechanism, and crypt morphology are indicated. Common insect names and their feeding habits are also shown. White rectangles on the phylogeny indicate the loss of the *Burkholderia* symbiosis and midgut crypts. Asterisks (\*) indicate the existence of exceptional taxa that have lost the *Burkholderia* symbiosis and midgut crypts and evolved secondarily bacteriocytes carrying endocellular symbionts (46, 47). The dagger (†) indicates the existence of several groups that have lost midgut crypts and gut symbionts (40).
